# Supplementary material for: New phenylselanyl group activation: synthesis of aziridines and oxazolidin-2-onesElectronic Supplementary Information (ESI) available: experimental section. See http://www.rsc.org/suppdata/ob/b4/b406566m/
Source: Royal Society of Chemistry journal article supplement (doi:10.1039/b406566m), 2004-01-01
Supplement: b406566m.doc [file b406566m.doc]

New Phenylselanyl Group Activation: Synthesis of Aziridines and Oxazolidin-2-ones

Catherine MINIEJEW,Francis OUTURQUIN* and Xavier PANNECOUCKE

Université de ROUEN, IRCOF, UMR CNRS6014, 1 rue Tesnière,

76131 Mont Saint-Aignan, France.

1H RMN (300 MHz) and 13C RMN (75 MHz) spectra were recorded on a Brucker DPX 300 instrument. Chemical shifts () for 1H and 13C RMN are recorded in CDCl3 as the solvant and quoted in ppm downfield from tetramethylsilane (TMS). Elemental analyses were obtained on a Carlo-Erba 1106 analysor and Mass Spectra on a HP5890 (electronic impact 70eV) using GC-MS coupling with a Joel AX 500.

**General procedure for aziridine synthesis.** To the -phenylselanyl amine **2** (1mmol) in acetonitrile (15ml) was added NBS (195mg, 1.1mmol) at room temperature. After 5 min of stirring the mixture became red-brown and sodium bicarbonate (212 mg, 2mmol) was introduced. The mixture turned rapidly yellow. Water (15ml) was added and the aqueous phase was extracted with CH2Cl2 (2×15ml). The combined organic phases were dried with MgSO4 and concentrated. The crude product was purified by column chromatography (cyclohexane/Et2O: 8/2) to afford the desired aziridine **3**.

**1-Benzyl-2-*t*-butylaziridine 3a**1

1H RMN0.67 (s, 9H, C(C*H*3)3), 1.11 (d, 1H, *J* = 6.5 Hz, H3), 1.17 (dd, 1H, *J* = 6.5, 3.5 Hz, H2), 1.64 (d, 1H, *J* = 3.5 Hz, H3), 3.02 (d, 1H, *J* = 13.0 Hz, C*H*2Ph), 3.55 (d, 1H, *J* = 13.0 Hz, C*H*2Ph), 7.11-7.27 (m, 5H, Ph). 13C RMN 25.8 (C(*C*H3)3), 29.0 (*C*(CH3)3), 29.5 (C3), 48.3 (C2), 64.6 (*C*H2Ph), 125.9, 127.1, 127.4, 138.6 (Ph). MS *m/z*189 (M+, 4), 174 (40), 146 (20), 91 (100), 69 (40), 56 (47), 41 (54).

**1-Benzyl-2-isopropylaziridine 3b**1

1H RMN 0.77 (d, 3H, *J* = 6.2 Hz, (C*H*3)2CH), 0.81 (d, 3H, *J* = 6.2 Hz, (C*H*3)2CH), 1.08-1.17 (m, 2H, (CH3)2C*H*, H2), 1.29 (d, 1H, *J* = 5.7 Hz, H3), 1.58 (d, 1H, *J* = 2.8 Hz, H1), 3.17 (d, 1H, *J* = 12.9 Hz, C*H*2Ph), 3.46 (d, 1H, *J* = 12.9 Hz, C*H*2Ph), 7.18-7.27 (m, 5H, Ph). 13C RMN 20.0 ((*C*H3)2CH), 20.9 ((*C*H3)2CH), 32.0 ((CH3)2*C*H), 33.7 (C3), 47.0 (C2), 65.6 (*C*H2Ph), 127.4, 128.6, 128.8, 139.8 (Ph). Anal. Calcd. for C12H17N: C, 82.23; H, 9.78; N, 7.99. Found: C, 82.05; H, 9.89; N, 8.02.

**1-Benzyl-2-butylaziridine 3c**

1H RMN 0.76 (d, 3H, *J* = 6.2 Hz, CH2CH2CH2C*H*3), 1.18-1.45 (m, 8H, C*H*2C*H*2C*H*2CH3, H2, H3), 1.53 (d, 1H, *J* = 3.0 Hz, H3), 3.25 (d, 1H, *J* = 13.3 Hz, C*H*2Ph), 3.41 (d, 1H, *J* = 13.3 Hz, C*H*2Ph), 7.18-7.21 (m, 5H, Ph). 13C RMN  14.2 (CH2CH2CH2*C*H3), 22.6 (CH2CH2*C*H2CH3), 29.7 (CH2*C*H2CH2CH3), 32.8 (*C*H2CH2CH2CH3), 34.2 (C3), 39.9 (C1), 65.1 (*C*H2Ph), 127.1, 128.3, 128.4, 139.5 (Ph). Anal. Calcd. for C13H19N: C, 82.48; H, 10.12; N, 7.40. Found: C, 82.59; H, 10.14; N, 7.48.

***N*-(2-bromohexyl)-benzylamine 7c**

1H RMN 0.83 (t, 3H, *J* = 7.2 Hz, H6), 1.11-1.42 (m, 5H, H5, H4, N*H*), 1.60-1.71 (m, 2H, H3), 2.84 (d, 1H, *J* = 6.1 Hz, H1), 3.72 (d, 1H, *J* = 13.3 Hz, C*H*2Ph), 3.80 (d, 1H, *J* = 13.3 Hz, C*H*2Ph), 4.09-4.17 (m, 1H, H2), 7.17-7.28 (m, 5H, Ph). 13C RMN  14.1 (C6), 22.5 (C5), 29.5 (C4), 36.7 (C3), 58.5 (C2), 56.0 (C1), 53.3 (*C*H2Ph), 126.9, 128.5, 127.8, 139.1 (Ph).

**1-Benzyl-2-methyl-2-phenylaziridine 3d**

2 invertomeres: 55/45

Major invertomere: 1H RMN1.51 (s, 3H, C*H*3), 1.86 (s, 1H, H3), 1.99 (s, 1H, H3), 2.71 (d, 1H, *J* = 13.8 Hz, C*H*2Ph), 3.38 (d, 1H, *J* = 13.8 Hz, C*H*2Ph), 7.18-7.35 (m, 10H, Ph). 13C RMN  27.4 (*C*H3), 39.6 (C2), 45.2 (C3), 58.9 (*C*H2Ph), 126.7, 127.6, 127.9, 128.3, 129.8, 138.2, 140.2, 145.5 (Ph). Minor invertomere : 1H RMN1.55 (s, 3H, C*H*3), 1.59 (s, 1H, H3), 2.03 (s, 1H, H3), 2.78 (s, 2H, C*H*2Ph), 7.18-7.35 (m, 10H, Ph). 13C RMN  16.6 (*C*H3), 41.5 (C3), 42.8 (C2), 57.2 (*C*H2Ph), 126.7, 127.6, 127.9, 128.3, 129.8, 138.2, 140.2, 145.5 (Ph). MS *m/z* 237 (M+, 1), 222 (62), 91 (100). Anal. Calcd. for C16H17N: C, 86.05; H, 7.67; N, 6.27. Found: C, 86.17; H, 7.83; N, 6.42

**1-Benzyl-2-methylaziridine 3e**1,2

1H RMN1.11 (d, 3H, *J* = 5.4 Hz, C*H*3), 1.27 (d, 1H, *J* = 6.2 Hz, H3), 1.42 (m, 1H, H2), 1.47 (d, 1H, *J* = 3.5 Hz, H3), 3.30 (d, 1H, *J* = 13.6 Hz, C*H*2Ph), 3.36 (d, 1H, *J* = 13.6 Hz, C*H*2Ph), 7.11-7.27 (m, 5H, Ph). 13C RMN 19.8 (*C*H3), 36.3 (C3), 36.4 (C2), 66.2 (*C*H2Ph), 128.4, 129.3, 129.8, 141.0 (Ph).

**1-Benzyl-2-phenylaziridine 3f** 3

1H RMN1.84 (d, 3H, *J* = 6.6 Hz, H3), 1.98 (d, 1H, *J* = 3.2 Hz, H3), 2.50 (dd, 1H, *J* = 3.2, 6.6 Hz, H2), 3.58 (d, 1H, *J* = 13.8 Hz, C*H*2Ph), 3.69 (d, 1H, *J* = 13.8 Hz, C*H*2Ph), 7.18-7.42 (m, 10H, Ph). 13C RMN 38.3 (C3), 41.9 (C2), 65.1 (*C*H2Ph), 126.7, 127.6, 128.2, 128.7, 129.8, 139.2, 140.5, 145.4 (Ph).

***cis* and *trans*-1-Benzyl-2-ethyl-3-methylaziridine 3g**1

1H RMN0.81 (t, 3H, *J* = 7.0 Hz, CH2C*H*3), 1.08 (d, 3H, *J* = 5.7 Hz, C*H*3), 1.26-1.50 (m, 4H, H2, H3, C*H*2CH3), 3.34 (d, 1H, *J* = 13.4 Hz, C*H*2Ph), 3.42 (d, 1H, *J* = 13.4 Hz, C*H*2Ph), 7.17‑7.24 (m, 5H, Ph). 13C RMN 10.9 (CH2*C*H3), 12.1 (*C*H3), 20.2 (*C*H2CH3), 38.1 (C3), 44.6 (C2), 64.0 (*C*H2Ph), 125.7, 127.0, 127.2 138.7 (Ph). MS m/z175 (M+, 1), 91 (23), 84 (100), 41 (36). Anal. Calcd. for C12H17N: C, 82.23; H, 9.78; N, 8.02. Found: C, 82.45; H, 10.10; N, 8.49.

The ratio cis/*trans* was determined by gas chromatography.

***cis*-1-Benzyl-2-methyl-3-phenylaziridine 3h**1,4

1H RMN0.89 (d, 3H, *J* = 5.6 Hz, C*H*3), 1.84 (m, 1H, H3), 2.60 (d, 1H, *J* = 6.6 Hz, H2), 3.50 (d, 1H, *J* = 13.8 Hz, C*H*2Ph), 3.71 (d, 1H, *J* = 13.8 Hz, C*H*2Ph), 7.13-7.36 (m, 10H, Ph). 13C RMN 14.2 (*C*H3), 43.2 (C3), 47.6 (C2), 65.9 (*C*H2Ph), 126.2, 127.7, 128.1, 128.2, 129.1, 129.6, 138.8, 140.7 (Ph).

***trans*-1-Benzyl-2-methyl-3-phenylaziridine 3h**1,4

1H RMN1.33(d, 3H, *J* = 5.9 Hz, C*H*3), 2.16 (qd, 1H, *J* = 3.1, 5.9 Hz, H3), 2.21 (d, 1H, *J* = 3.1 Hz, H2), 3.68 (d, 1H, *J* = 14.3 Hz, C*H*2Ph), 3.86 (d, 1H, *J* = 14.3 Hz, C*H*2Ph), 7.11-7.28 (m, 10H, Ph). 13C RMN 11.4 (*C*H3), 42.8 (C3), 48.4 (C2), 55.3 (*C*H2Ph), 127.0, 128.0, 128.4, 128.7, 129.3, 130.1, 140.5, 141.1 (Ph). MS *m/z* 223 (M+, 2), 132 (100), 105 (45), 91 (28). Anal. Calcd. for C16H17N: C, 86.05; H, 7.67; N, 6.27. Found: C, 86.32; H, 7.91; N, 6.61.

**General procedure for oxazolidin-2-one synthesis.** To the *N*-Boc -phenylselanyl amine **8** (1mmol) in acetonitrile (15ml) was added NBS (195mg, 1.1mmol) at room temperature. After 20 min of stirring sodium bicarbonate (212 mg, 2mmol) was introduced. Water (15ml) was added and the aqueous phase was extracted with CH2Cl2 (2×15ml). The combined organic phases were dried with MgSO4 and concentrated. The crude product was purified by column chromatography (cyclohexane/Et2O: 7/3) to afford the desired oxazolidin-2-one **9**.

**3-Benzyl-4-methyl-oxazolidin-2-one 9f**5

1H RMN1.22 (d, 3H, *J* = 6.1 Hz, C*H*3), 3.64-3.75 (m, 1H, H4), 3.87 (dd, 1H, *J* = 7.2, 8.2 Hz, H5), 4.11 (d, 1H, *J* = 15.3 Hz, C*H*2Ph), 4.37 (dd, 1H, *J* = 7.2, 8.2 Hz, H5), 4.78 (d, 1H, *J* = 15.3 Hz, C*H*2Ph), 7.14-7.38 (m, 5H, Ph). 13C RMN 18.0 (*C*H3), 45.8 (*C*H2Ph), 50.3 (C4), 69.1 (C5), 127.9, 128.2, 128.9, 136.4 (Ph), 158.5 (C2). MS *m/z* 192 (M+,81), 104 (54), 91 (100), 65 (27). Anal. Calcd. for C11H13NO2: C, 69.11; H. 7.32; N, 6.91. Found: C, 69.24; H, 6.99; N, 6.56.

***cis*-3-Benzyl-4-ethyl-5-methyl-oxazolidin-2-one 9g**6

1H RMN0.80 (t, 3H, *J* = 7.4 Hz, CH2C*H*3), 1.26 (d, 3H, *J* = 6.6 Hz, C*H*3), 1.45-1.68 (m, 2H, C*H*2CH3), 3.37-3.44 (m, 1H, H4), 3.98 (d, 1H, *J* = 15.3 Hz, C*H*2Ph), 4.54 (dq, 1H, *J* = 6.6, 6.9 Hz, H5), 4.73 (d, 1H, *J* = 15.3 Hz, C*H*2Ph), 7.19-7.33 (m, 5H, Ph). 13C RMN 9.7 (CH2*C*H3), 14.6 (*C*H3), 20.0 (*C*H2CH3), 46.2 (*C*H2Ph), 58.5 (C4), 73.9 (C5), 127.8, 127.9, 128.0, 136.4 (Ph), 158.6 (C2).

***trans*-3-Benzyl-4-ethyl-5-methyl-oxazolidin-2-one 9g**

1H RMN0.78 (t, 3H, *J* = 7.4 Hz, CH2C*H*3), 1.25 (d, 3H, *J* = 6.4 Hz, C*H*3), 1.45-1.68 (m, 2H, C*H*2CH3), 2.97-2.03 (m, 1H, H4), 3.97 (d, 1H, *J* = 15.2 Hz, C*H*2Ph), 4.19 (qd, 1H, *J* = 5.9, 6.1 Hz, H5), 4.75 (d, 1H, *J* = 15.2 Hz, C*H*2Ph), 7.19-7.25 (m, 5H, Ph). 13C RMN 8.0 (CH2*C*H3), 21.1 (*C*H3), 23.9 (*C*H2CH3), 45.8 (*C*H2Ph), 61.8 (C4), 74.8 (C5), 127.8, 127.9, 128.1, 136.1 (Ph), 158.0 (C2). MS *m/z* 219 (M+,24), 150 (26), 91 (100). Anal. Calcd. for C13H17NO2: C, 71.23; H, 7.76; N, 6.39. Found: C, 71.06; H, 8.12; N, 6.73.

***cis*-3-Benzyl-5-methyl-4-phenyl-oxazolidin-2-one 9h**

1H RMN1.28 (d, 3H, *J* = 6.1 Hz, C*H*3), 3.56 (d, 1H, *J* = 14.8 Hz, C*H*2Ph), 3.91 (d, 1H, *J* = 7.4 Hz, H4), 4.30 (dq, 1H, *J* = 6.1, 7.4 Hz, H5), 4.79 (d, 1H, *J* = 14.8 Hz, C*H*2Ph), 7.02-7.41 (m, 10H, Ph). 13C RMN 19.3 (*C*H3), 46.0 (*C*H2Ph), 66.4 (C4), 78.9 (C5), 127.5, 128.0, 128.7, 128.8, 129.2, 129.4, 135.5, 136.9 (Ph), 158.1 (C2). MS *m/z* 267 (M+,3), 118 (100), 91 (31). Anal. Calcd. for C17H17NO2: C, 76.40; H, 6.37; N, 5.24. Found: C, 76.29; H, 6.03; N, 5.37.

**References**

1 S. Boivin, F. Outurquin, and C. Paulmier, *Tetrahedron Lett.*, 2000, **41**, 663.

1. W. Chamchaang and A. Pinhas, *J. Org. Chem.*, 1990, **55**, 2943.
2. I. Shahak, Y. Ittah, and J. Blum, *Tetrahedron Lett.*, 1976, 4003. J. R. Pfister, *Synth. Comm.*, 1984, 969. A. M. Kawamoto and M. Wills, *J. Chem. Soc. ; Perkin Trans 1*, 2001, 1916.
3. T. N. Van and N. De Kimpe, *Tetrahedron*, 2000, **56**, 7299.
4. J. J. Posakony and T. J. Tewson, *Synthesis*, 2002, 766.J.
5. J. Schwerdtfeger, S. Kolczewski, B. Weber, R. Fröhlich, and D. Hoppe, *Synthesis*, 1999, 1573.
